# Supplementary material for: Direct whole-genome sequencing of Plasmodium falciparum specimens from dried erythrocyte spots
Source: PubMed Central journal article supplement (PMC5824530; doi:10.1186/s12936-018-2232-6), 2018-02-23
Supplement: 12936_2018_2232_MOESM1_ESM.pdf [file 12936_2018_2232_MOESM1_ESM.pdf]

Supplementary Table 1A. SNP analysis

| gene<br>codon   | pfdhfr |    |    |     |     | pfmdr1 |     |      |      |      | pfcrt |    |    |    |    | pfdhps |     |     |     |     | pfk13 |     |
|-----------------|--------|----|----|-----|-----|--------|-----|------|------|------|-------|----|----|----|----|--------|-----|-----|-----|-----|-------|-----|
|                 | 16     | 51 | 59 | 108 | 164 | 86     | 184 | 1034 | 1042 | 1246 | 72    | 73 | 74 | 75 | 76 | 431    | 436 | 437 | 540 | 581 | 613   | 189 |
| <b>3d7</b>      | A      | N  | C  | S   | I   | N      | Y   | S    | N    | D    | C     | V  | M  | N  | K  | I      | S   | G   | K   | A   | A     | T   |
| <b>Sample 1</b> | A      | N  | C  | S   | I   | Y      | F   | S    | N    | D    | C     | V  | I  | E  | T  | I      | S   | A   | K   | A   | A     | T   |
| <b>Sample 2</b> | A      | I  | R  | N   | I   | N      | F   | S    | N    | D    | C     | V  | I  | E  | T  | I      | S   | G   | K   | A   | A     | N   |
| <b>Sample 3</b> | A      | N  | C  | S   | I   | N      | Y   | S    | N    | D    | C     | V  | M  | N  | K  | I      | S   | G   | K   | A   | A     | T   |
| <b>Sample 4</b> | A      | I  | R  | N   | I   | N      | Y   | S    | N    | D    | C     | V  | I  | E  | T  | I      | S   | G   | K   | A   | A     | T   |
| <b>Sample 5</b> | A      | I  | R  | N   | I   | N      | Y   | S    | N    | D    | C     | V  | M  | N  | K  | I      | A   | A   | K   | A   | A     | T   |

Supplementary Table 1B. Individual gene-coverage

|                 | pfdhfr | pfmdr1 | pfcrt | pfdhps | pfk13 |
|-----------------|--------|--------|-------|--------|-------|
| <b>Sample 1</b> | 100%   | 100%   | 100%  | 100%   | 100%  |
| <b>Sample 2</b> | 100%   | 100%   | 100%  | 100%   | 100%  |
| <b>Sample 3</b> | 100%   | 100%   | 100%  | 100%   | 100%  |
| <b>Sample 4</b> | 100%   | 100%   | 69%   | 100%   | 100%  |
| <b>Sample 5</b> | 100%   | 100%   | 79%   | 100%   | 100%  |
